# Supplementary material
Source: PubMed Central journal article supplement (PMC11029727)
Supplement: 262_2015_1758_MOESM1_ESM.pdf [file 262_2015_1758_MOESM1_ESM.pdf]

## Disease-Free Survival

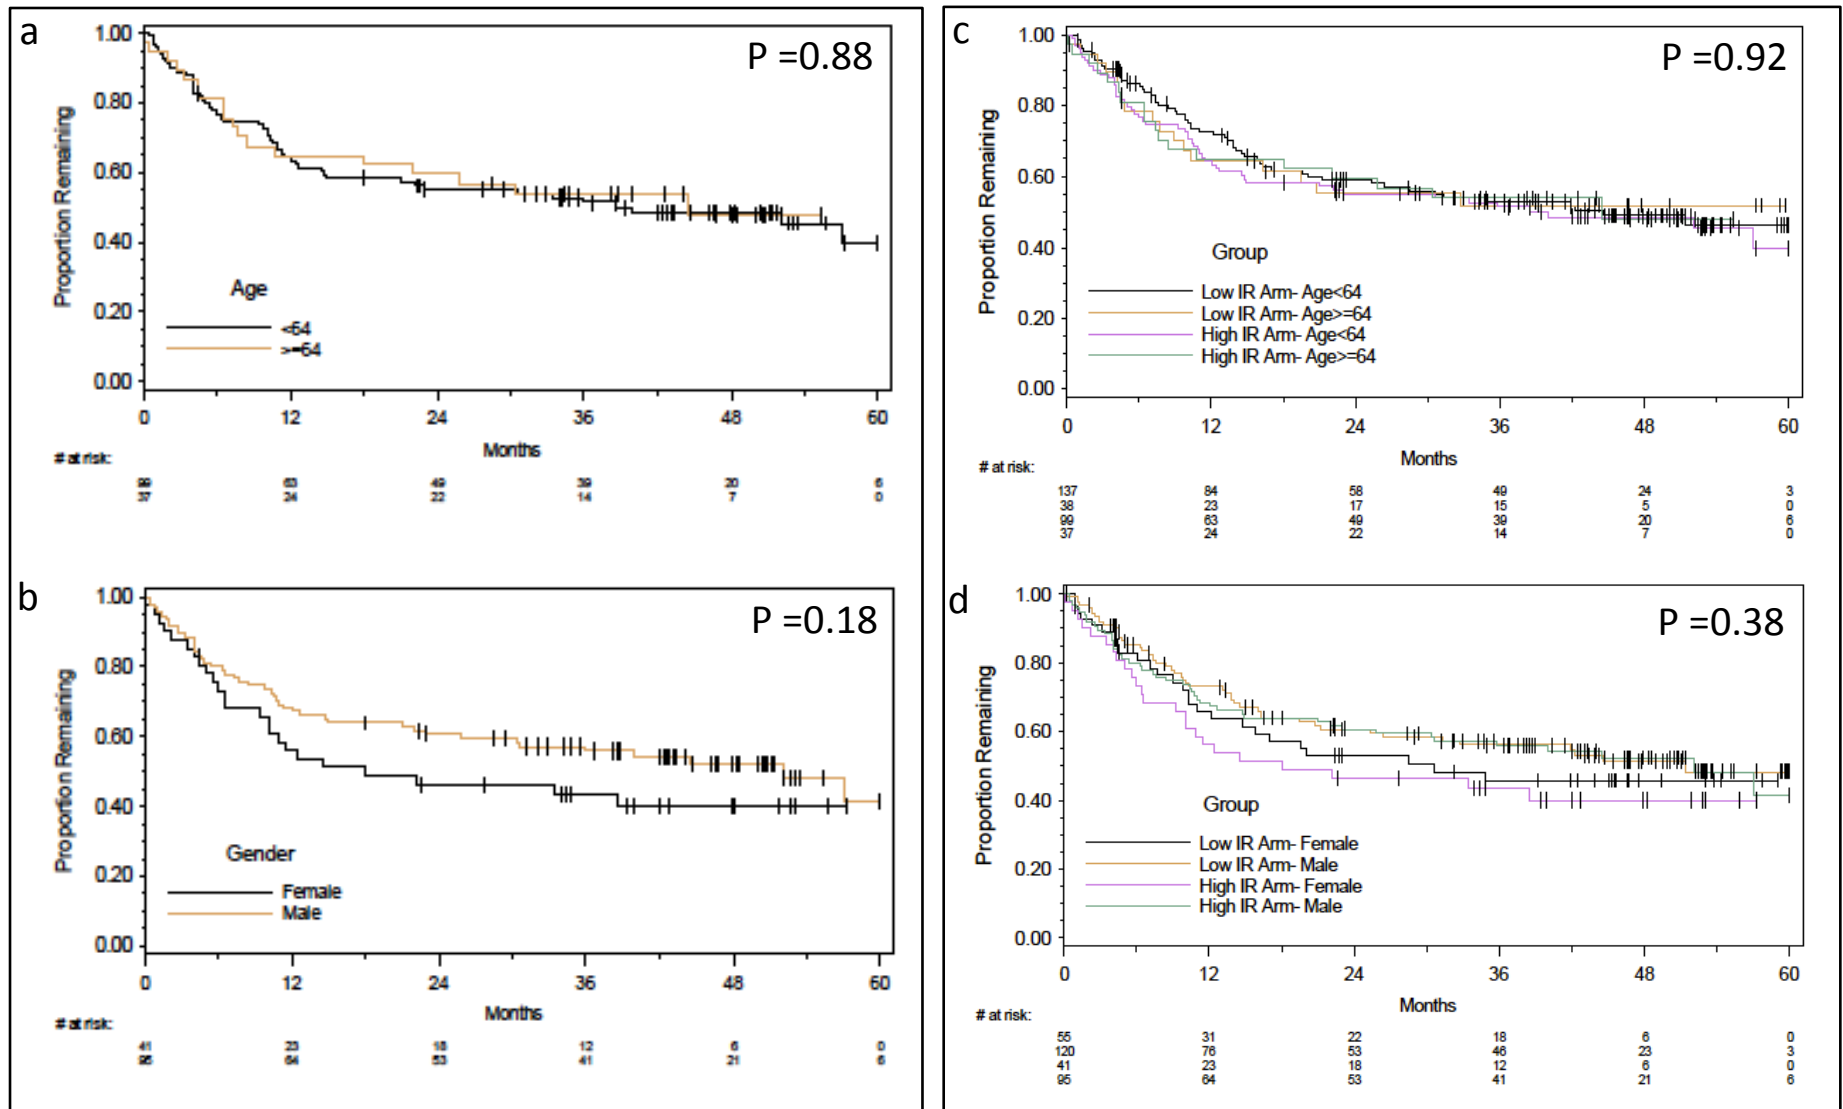

**Supplemental Figure 1:** Subset analysis Kaplan-Meier survival graphs of age (top) and gender (bottom) versus disease-free survival (DFS). The high responder group is shown on the left column and both high and low responder groups on the right column **a**. Association between age and DFS **b**. Effect of gender on DFS **c**. Age versus disease-free survival subdivided into high and low responder groups **d**. Gender versus disease-free survival subdivided into high and low responder group

# Overall Survival

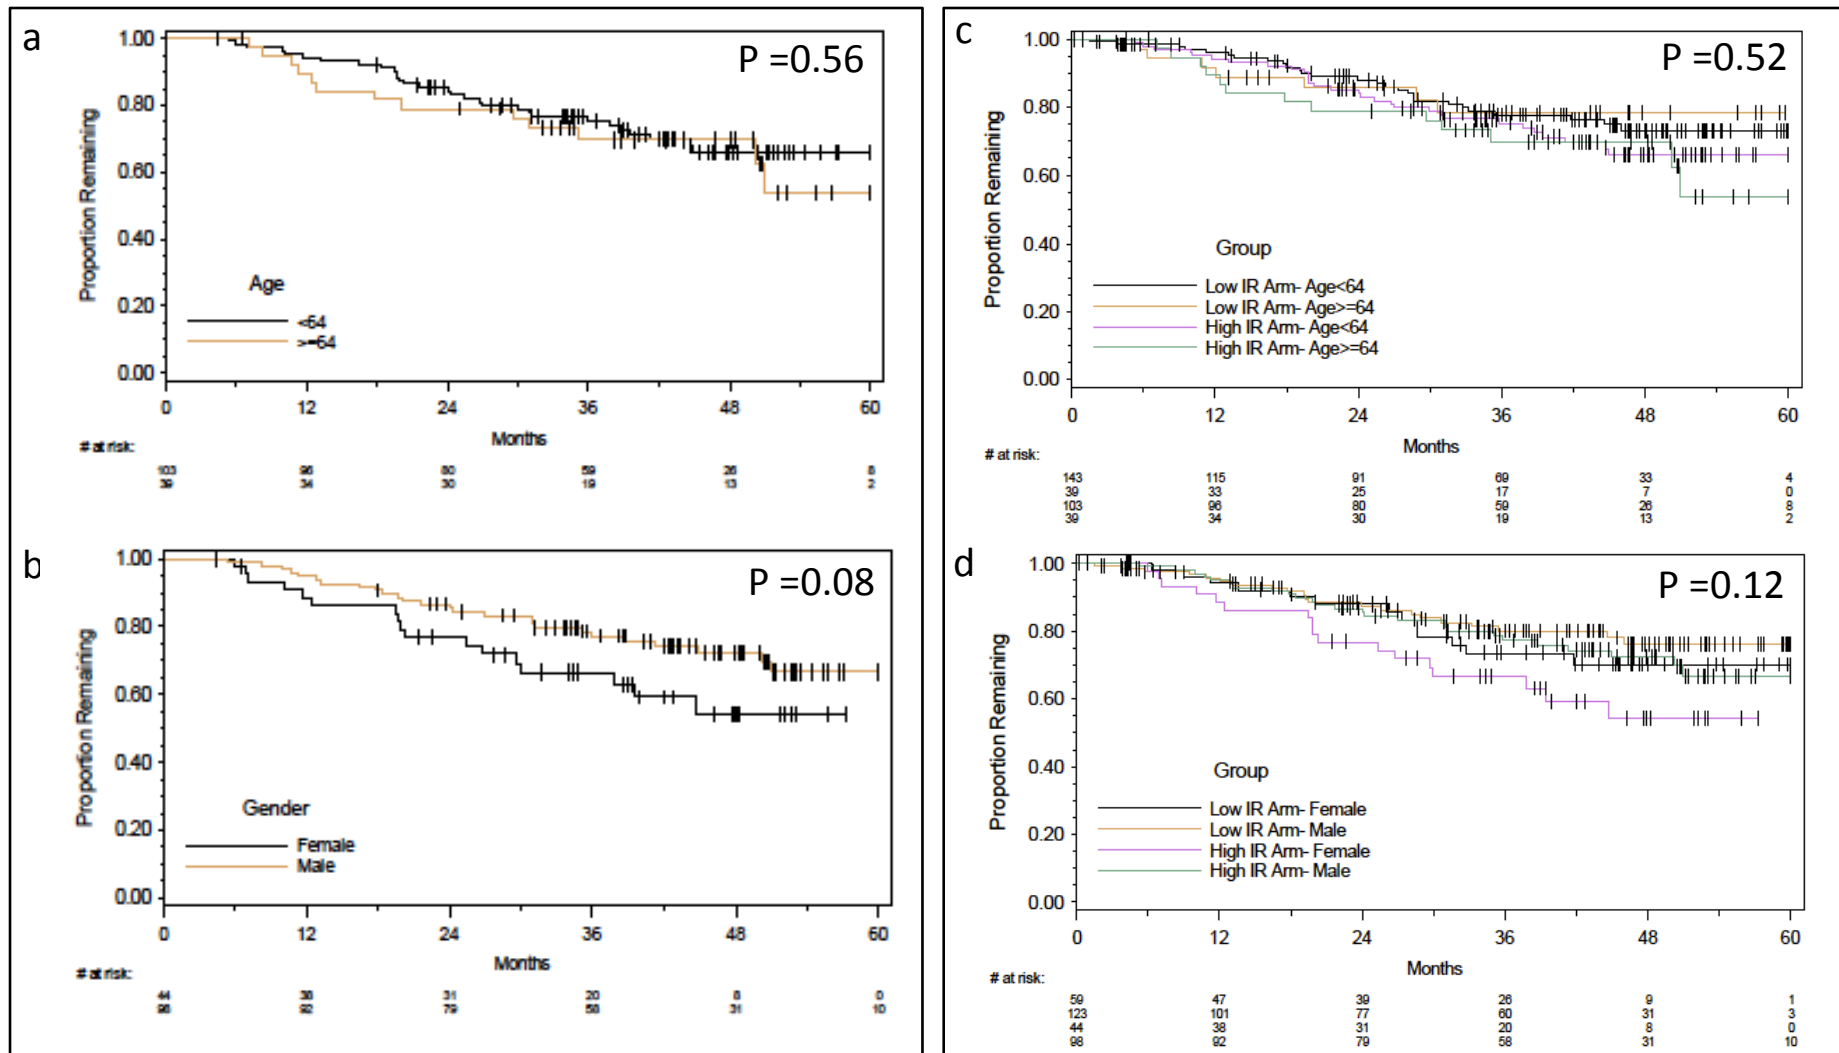

**Supplemental Figure 2:** Subset analysis Kaplan-Meier survival graphs of age (top) and gender (bottom) versus overall survival. The high responder group is shown on the left column and both high and low responder groups on the right column **a**. Association between age and OS **b**. Effect of gender on OS **c**. Age versus overall survival subdivided into high and low responder groups **d**. Gender versus overall survival subdivided into high and low responder group
